# Supplementary material
Source: Springer Nature journal article supplement (https://www.springermedizin.de/resource/supplementary/12936_2012_2159_MOESM1_ESM.pdf/9542732)
Supplement: MOESM1 [file 9542732]

1. *I was late to come back from work.....I agree to pay all costs that may be involved in spraying my house.*
2. *I didn't reject the exercise, I went to another village to attend funeral.*
3. *My wife and I were not at home: my wife had gone to hospital, I myself had a meeting somewhere.*
4. *My wife was in the farm, my son was at his work, myself I was also in my office, only our daughter was at home and she could not do anything. We will be ready our house to sprayed if: we are furnished with enough information about the side-effects of the icon, the spray is conducted on weekends or late evening when everybody is at home.*
5. *My house was not sprayed because I live with young daughters below 12 years. They may be affected in their reproductive system. So I can accept the spray in the rest of the rooms except that room [where daughters reside].*
6. *My family does not like IRS so I can't force them.....I will talk to them.*
